# Supplementary material for: LTR-Retrotransposons from Bdelloid Rotifers Capture Additional ORFs Shared between Highly Diverse Retroelement Types
Source: PubMed Central journal article supplement (PMC5408684; doi:10.3390/v9040078), 2017-04-11
Supplement: viruses-09-00078-s001.pdf [file viruses-09-00078-s001.pdf]

**Table S1.** Primers used for ORF3 amplification.

| <b>Primer name<sup>1</sup></b> | <b>Sequence (5'→3')</b>  |
|--------------------------------|--------------------------|
| Vesta1a_F                      | TGGCCATCTTGTCCATCTGT     |
| Vesta1a_R                      | AAGCGAAACAGAAAGGAAAAGT   |
| Vesta1b_F                      | ACATCTTCCCACCTTTCCTCA    |
| Vesta1b_R                      | CAGAAGTGATAGCATCGAGTGT   |
| Vesta1_F                       | GCATTTCTGTGTTTGTACTTCCT  |
| Vesta1_R                       | AGGAAACGCGTAACCCAAAT     |
| TelKA1_F                       | AACGATTTCGGAACAAAATGC    |
| TelKA1_R                       | TGGACCGTTGTTGTTGATTC     |
| TelKA1a_F                      | GCATTAGACATGCAGAATCATATC |
| TelKA1a_R                      | CAAGTTAAAGATCGGAAAGCAA   |
| TelKA2_F                       | GACGACGTCAACCAGCAGTA     |
| TelKA2_R                       | TGCTTGACGTCTTTTTGGAA     |
| TelKA2n_F                      | CAAGCAAAAAGAAGCAGTCCA    |
| TelKA2n_R                      | TGGTTGTTGAGTGTGTTTCGAT   |
| TelKA3a_F                      | TCACAAACATGTTACAACCTCTCA |
| TelKA3a_R                      | ACGCTCTCCTGAGCGTCTTA     |
| TelKA3b_F                      | TCACAAATATGTCGAAATCTTCG  |
| TelKA3b_R                      | GGTAGGTGGGGAGAGAGAG      |

<sup>1</sup>F: forward; R: reverse
